# Supplementary material
Source: PubMed Central journal article supplement (PMC3237196)

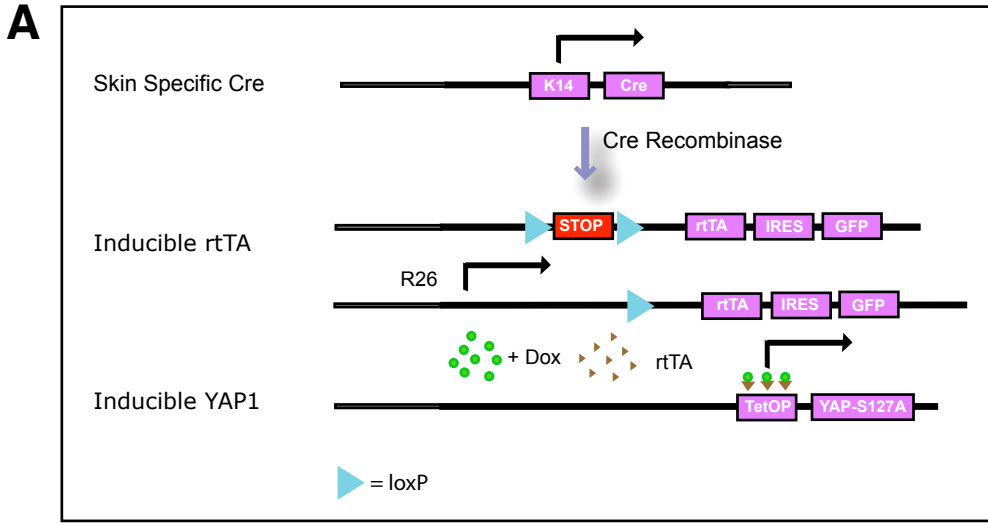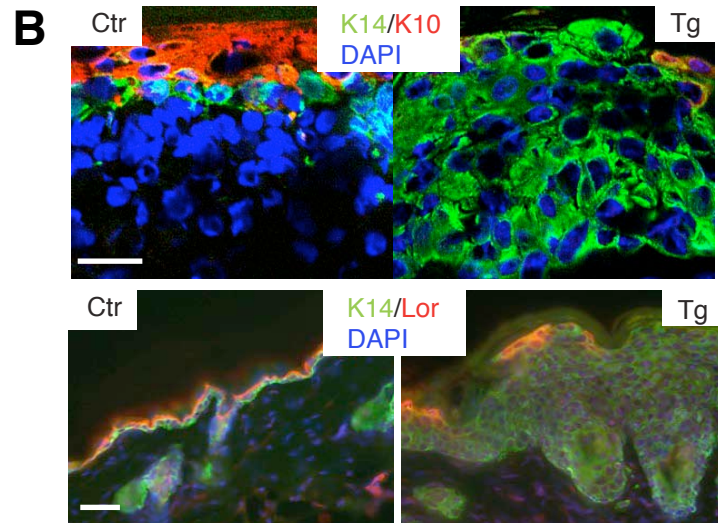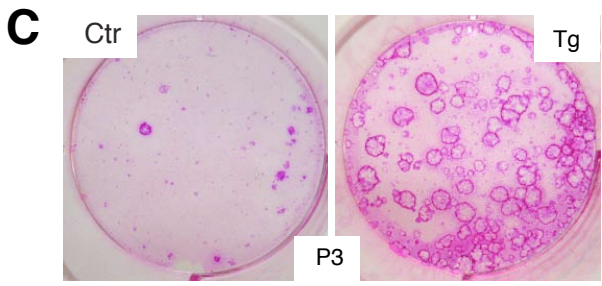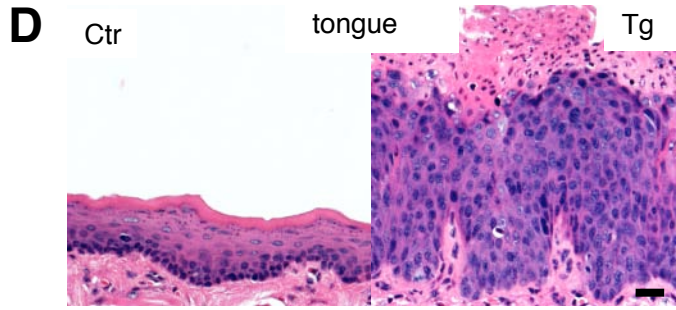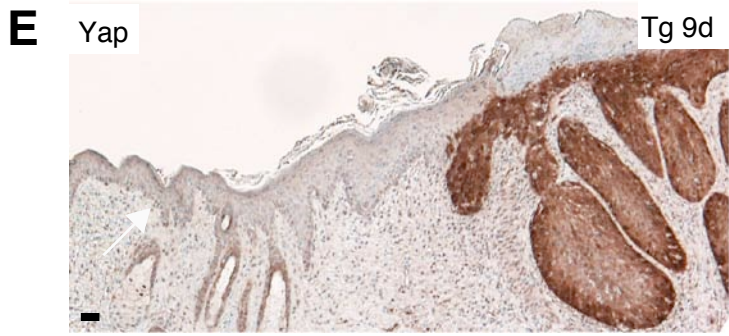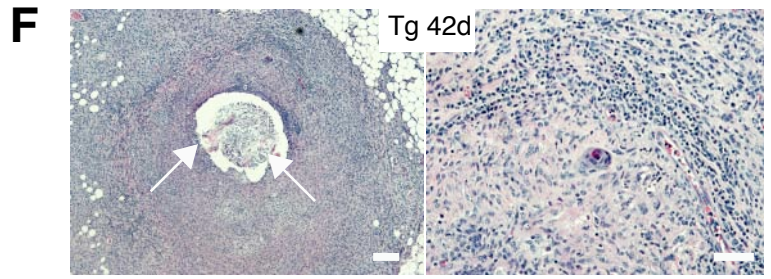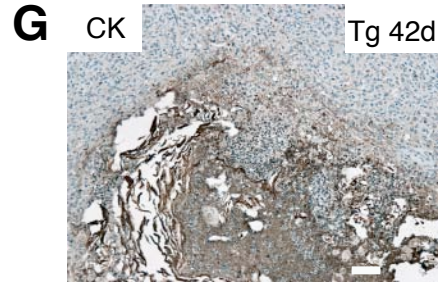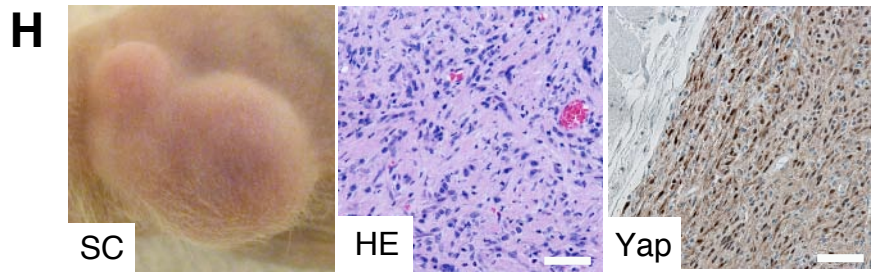

S2

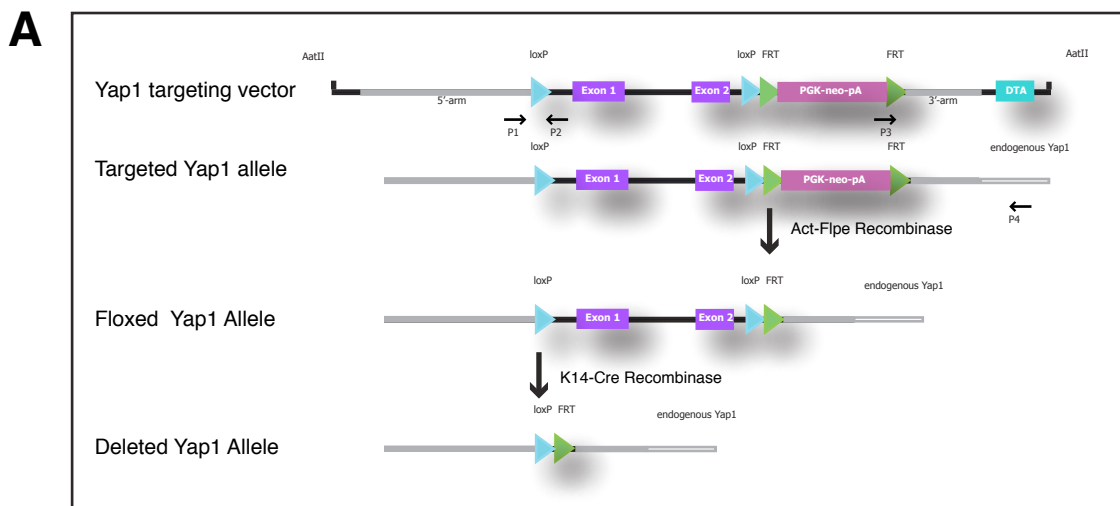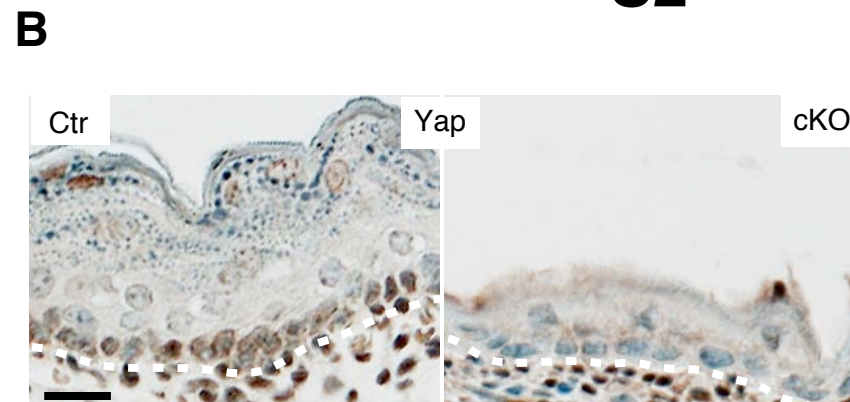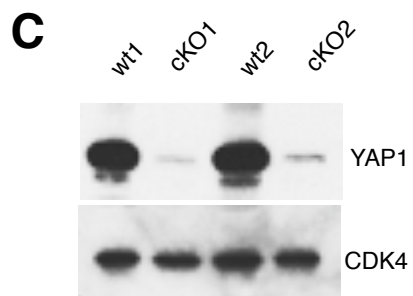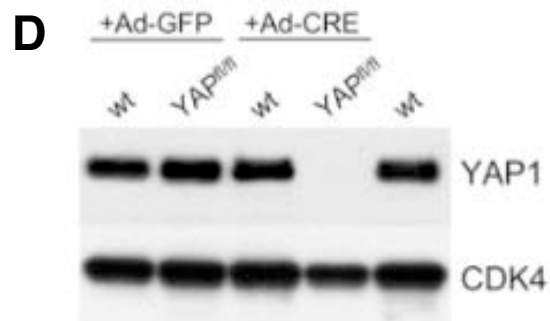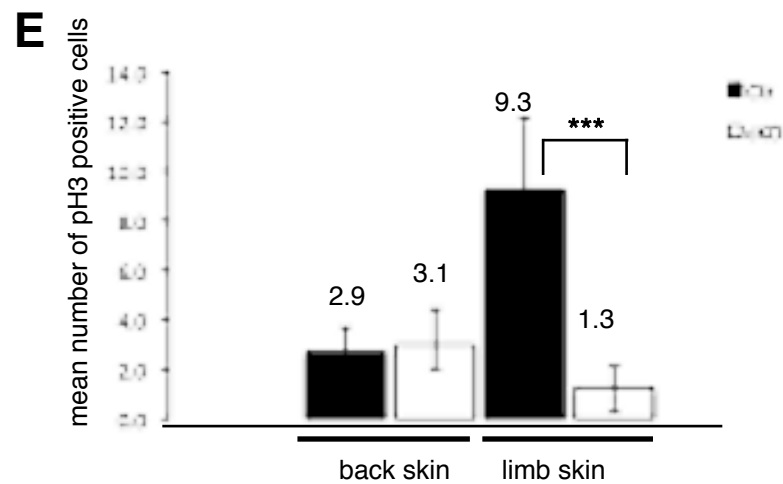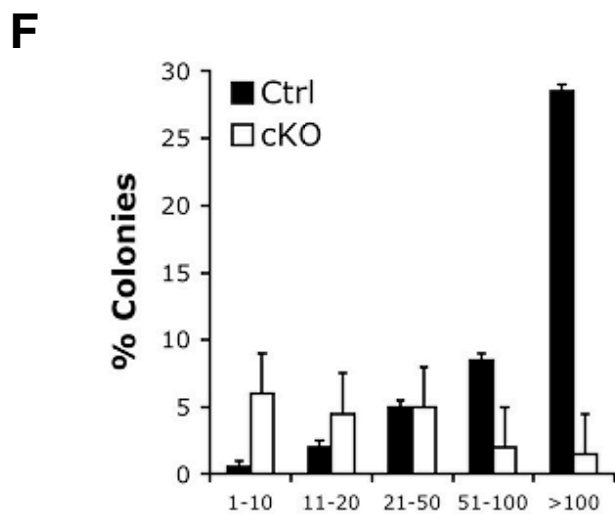

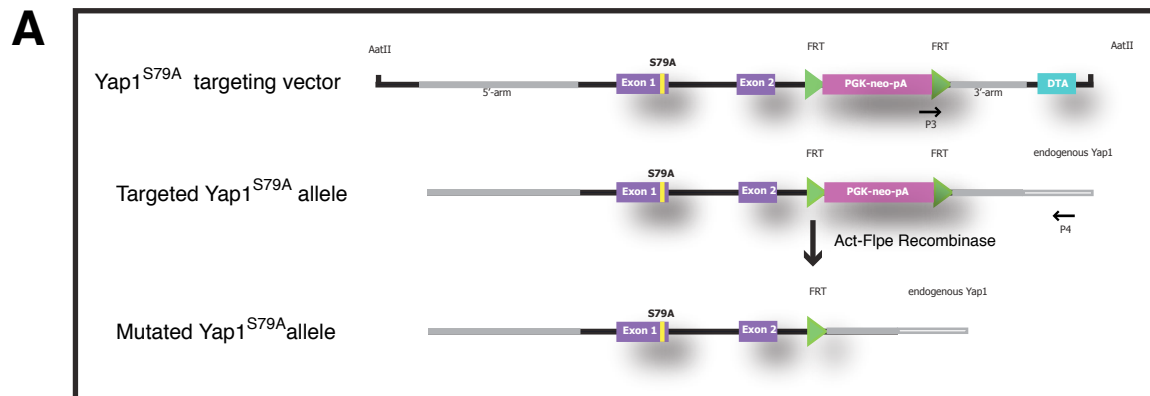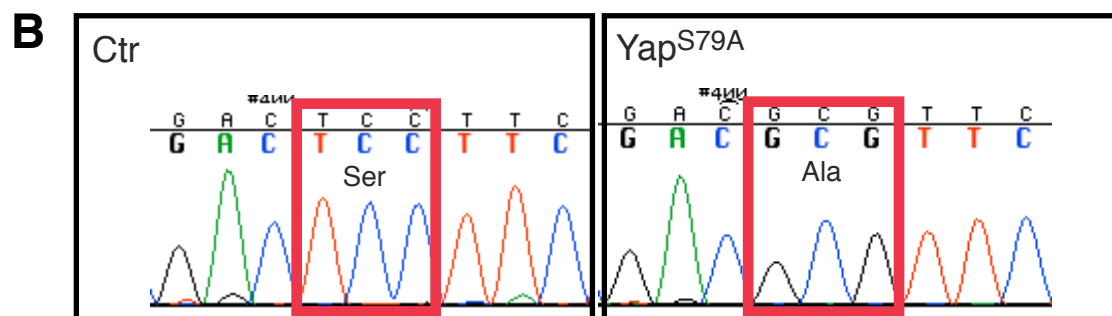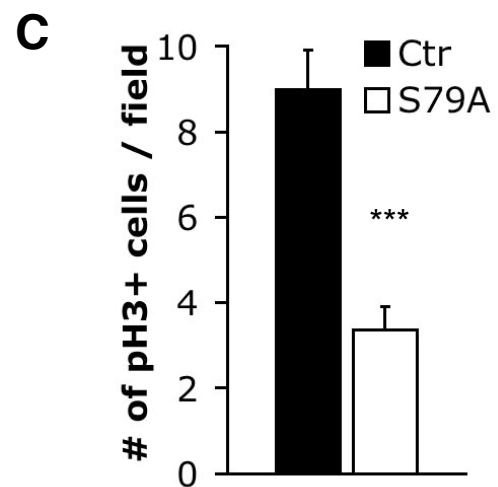



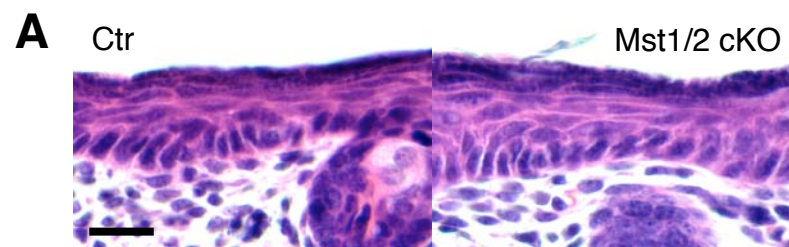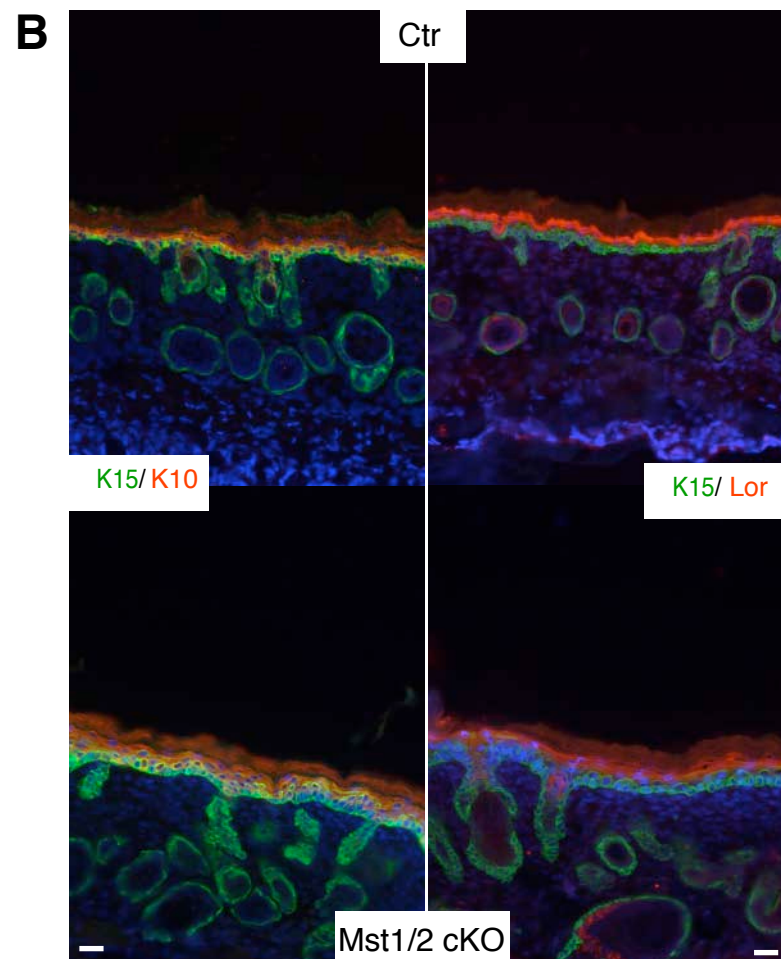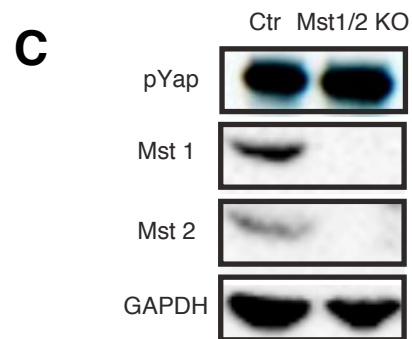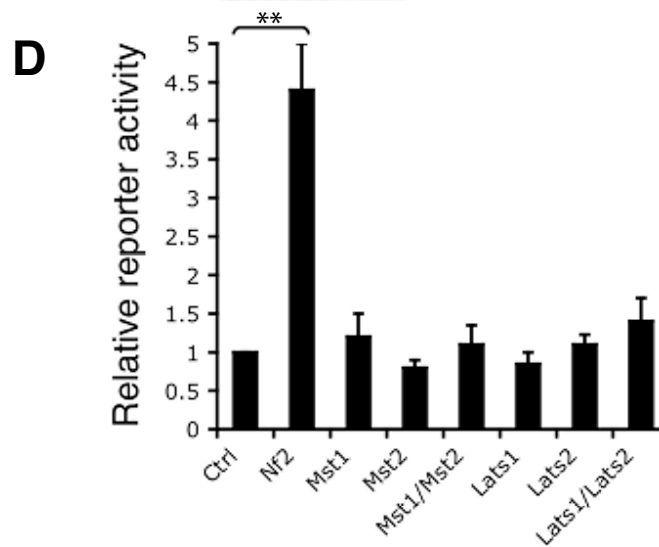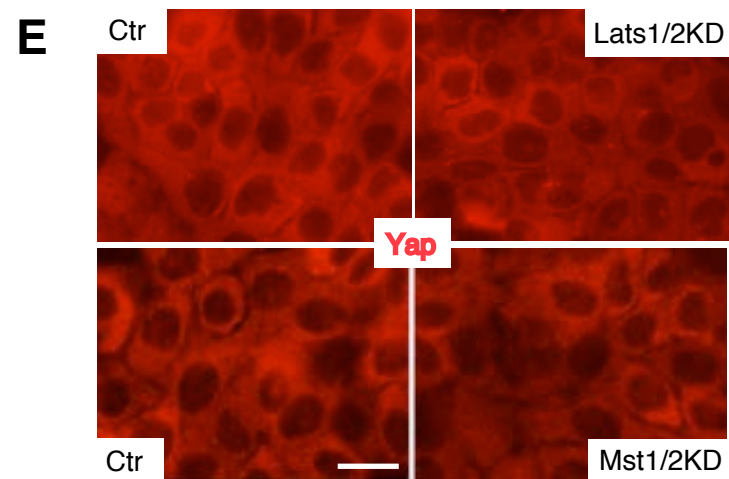

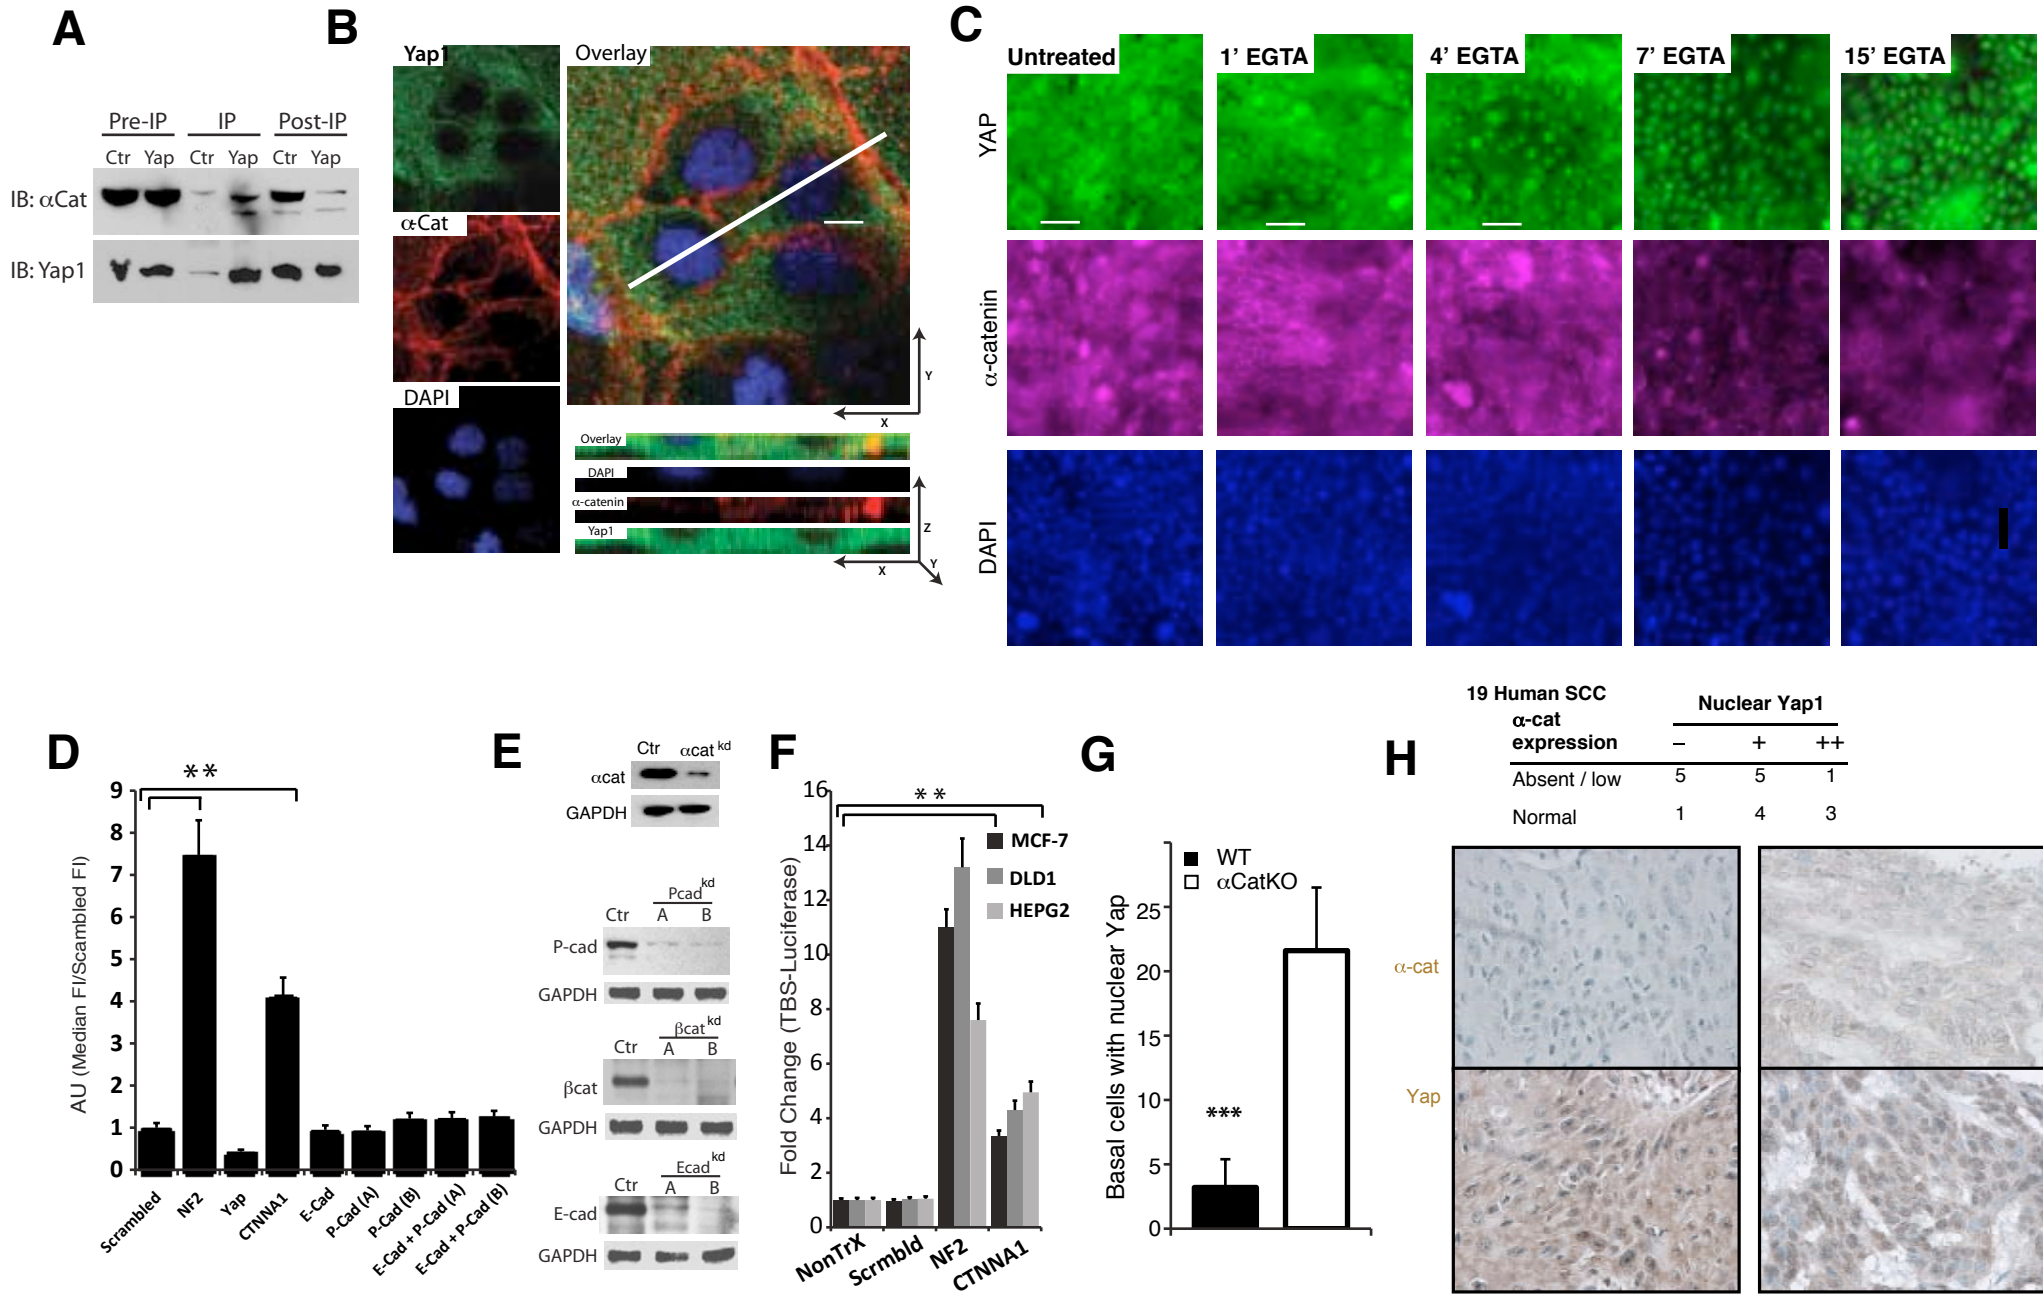

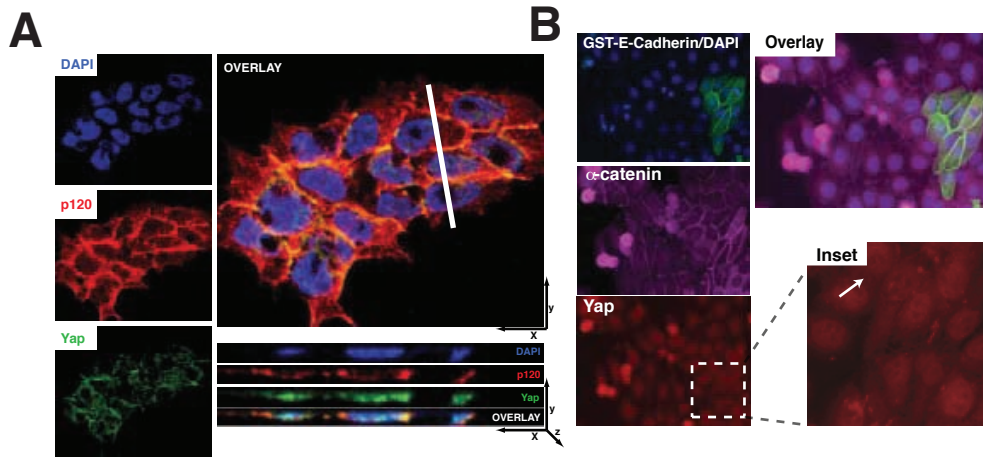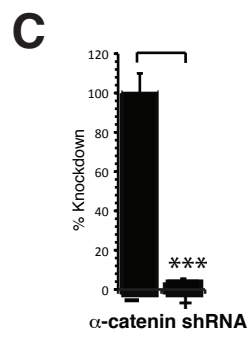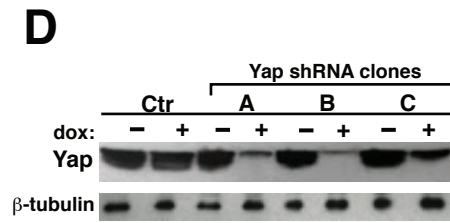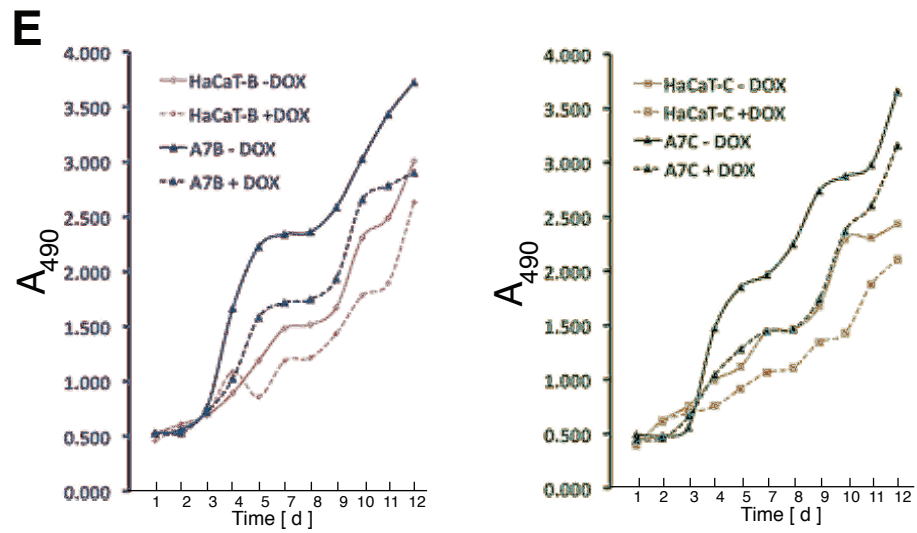

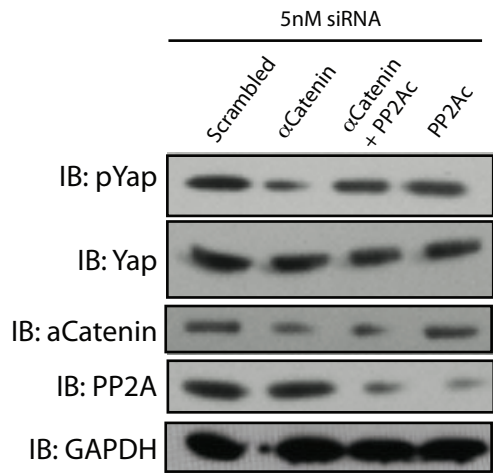

Supplement: NIHMS276427-supplement-02.pdf [file NIHMS276427-supplement-02.pdf]
